# Supplementary material for: Modulation of Macrophage Activity by Pulsed Electromagnetic Fields in the Context of Fracture Healing
Source: MDPI journal article supplement (doi:10.3390/bioengineering8110167), 2021-10-29
Supplement: s1 [file s1]

# Modulation of Macrophage Activity by Pulsed Electromagnetic Fields in the Context of Fracture Healing

Yangmengfan Chen, Maximilian M. Menger, Benedikt J. Braun, Sara Schweizer, Caren Linnemann, Karsten Falldorf, Michael Ronniger, Hongbo Wang, Tina Histing, Andreas K. Nussler and Sabrina Ehnert

Uncropped Western blot images for Phospho-Stat1:

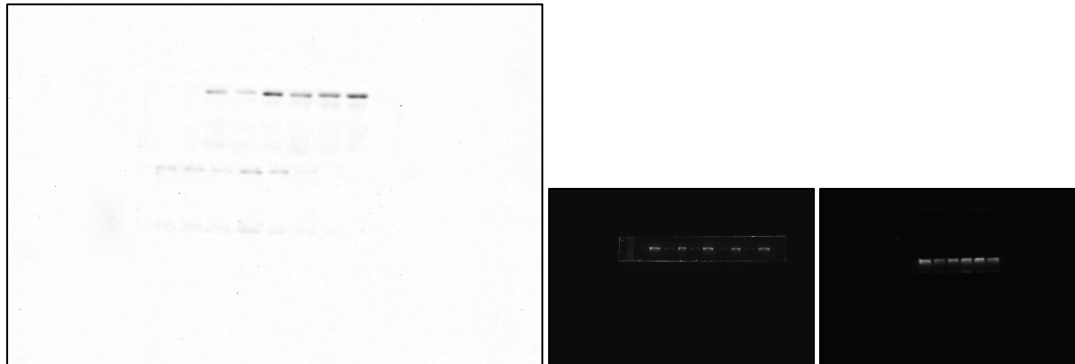

(2 Membranes / invers)

other membranes

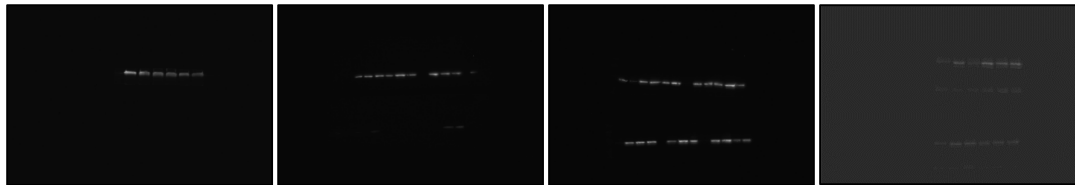

Uncropped Western blot images for CD86:

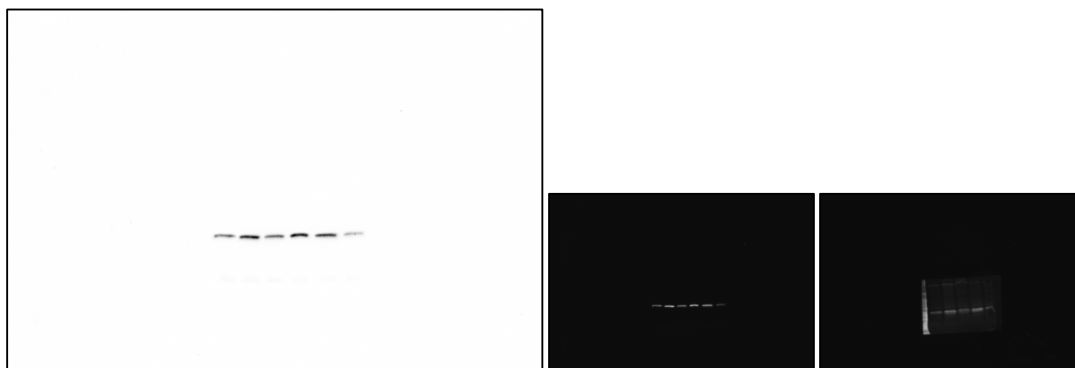

(1 Membrane / invers)

other membranes

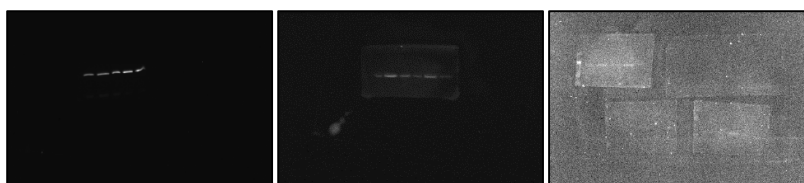

Uncropped Western blot images for CD86:

### Uncropped Western blot images for Arginase 1:

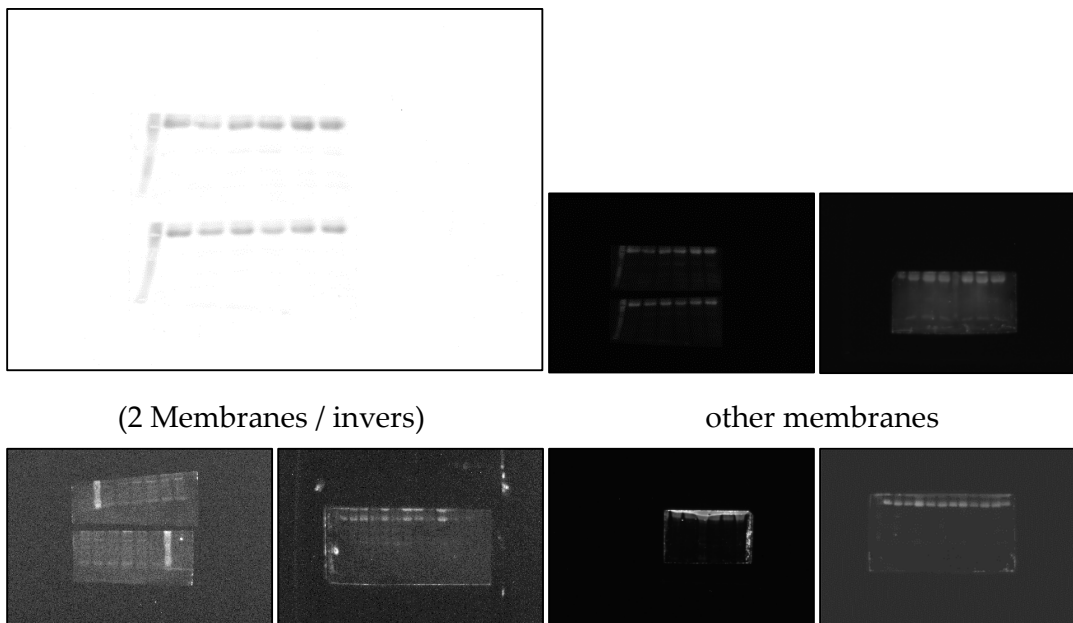

### Uncropped Western blot images for GAPDH:

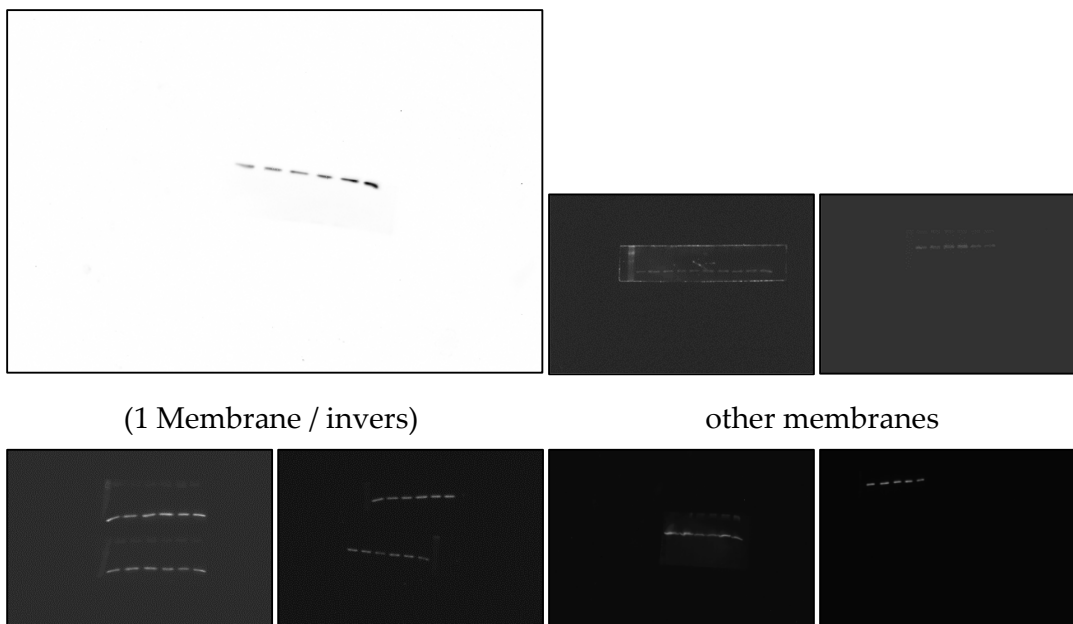

**Figure S1.** Uncropped Western Blot Images. Western blot images shown in Figure 2 A are shown inverse (black on white) as in the manuscript. Other membranes are summarized not inverse.

## Uncropped Agarose Gel Electrophoresis images from all RT-PCRs:

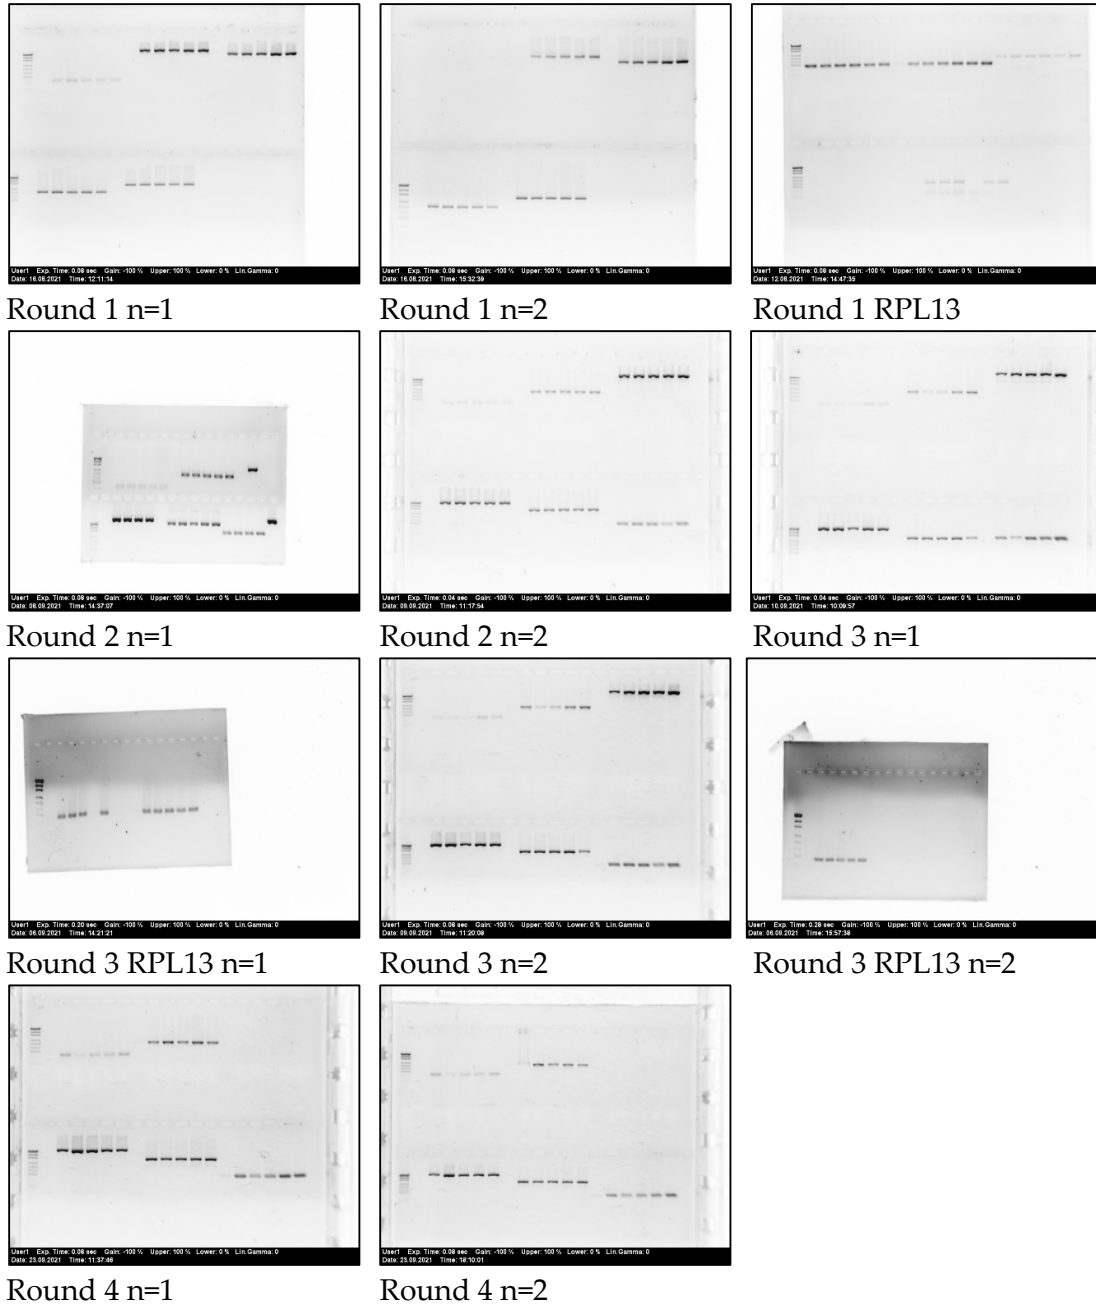

**Figure S2.** Uncropped Agarose Gel Electrophoresis Images shown in Figure 6 A and other rounds. As size marker PUC19 was used. Each round showing bands for Collagen 1A1 (83 bp), RPL13a (100 bp), Fibronectin (203 bp), Versican (306 bp), Biglycan (501 bp), and Decorin genomic DNA (> 500 p).
